# Supplementary material for: COVID-19-Related Neuropathic Pain: A Systematic Review and Meta-Analysis
Source: MDPI journal article supplement (doi:10.3390/jcm12041672), 2023-02-20
Supplement: s1 [file s1]

| Study (NP)              | Patient Characteristics                                                                                                                                                                                                                                 | No. of included patients | NP assessment / Definition                                                                     | Time since COVID-19 to NP development                                                   | NP related clinical risk factors                                                                                                                                                                                                                                                    |
|-------------------------|---------------------------------------------------------------------------------------------------------------------------------------------------------------------------------------------------------------------------------------------------------|--------------------------|------------------------------------------------------------------------------------------------|-----------------------------------------------------------------------------------------|-------------------------------------------------------------------------------------------------------------------------------------------------------------------------------------------------------------------------------------------------------------------------------------|
| Miller et al, 2021 [25] | COVID-19 critical care patients (severe)<br>54.5 years (mean age)<br>80% hypertension, 46% type 2 diabetes, 53% obesity<br>32.5 days average critical care admission stay                                                                               | 256                      | Assessment via nerve conduction studies in hospital / clinical signs in neurology appointments | Not documented                                                                          | Secondary neuropathic pain due to long ITU prone positioning                                                                                                                                                                                                                        |
| Ojeda et al, 2022 [28]  | Hospitalised<br>55-76 years of age<br>Pain impacting daily living of patients<br>5 patients reported widespread body pain<br>Neuropathic pain reported mostly extremities and upper limb                                                                | 65                       | Assessment via brief pain inventory and DN4 questionnaires                                     | 1 month after discharge                                                                 | Pain intensity risk factor of chronic pain                                                                                                                                                                                                                                          |
| Magdy et al, 2022 [31]  | Steroids, azithromycin, other medications during COVID-19, different combinations for each patient<br>27 – 60 years<br>14 / 90 smokers                                                                                                                  | 90                       | Assessment via neurological examination and DN4 questionnaire                                  | Immediately following COVID-19 infection (upon hospitalisation) and delayed (3 months+) | Length of COVID-19 disease (results suggestive longer duration heightens NP risk)<br>Comorbidity, smoking not suggestive risk factors<br>Azithromycin use is a risk factor for neuropathic pain following COVID-19<br>Higher NFL levels<br>Depression presence<br>COVID-19 severity |
| Ocak & Sahin, 2022 [27] | Patients from COVID-19 outpatient clinic<br>232 males<br>50% +ve PCR<br>166 active smokers<br>36 regular alcohol users<br>Mean age younger for those reporting pain, vs those without pain<br>Comorbidities excluded<br>Different education backgrounds | 440                      | Assessment via neuropathic pain questionnaire online                                           | Not documented                                                                          | Women higher pain intensity average<br>No difference between genders for neuropathic pain presence                                                                                                                                                                                  |
| Ali et al, 2022 [23]    | Non-hospitalised<br>Long Covid                                                                                                                                                                                                                          | 50                       | Assessment via phone or email questionnaire                                                    | 14.8 months (average)                                                                   | Autonomic dysfunction suggested as potential risk factor                                                                                                                                                                                                                            |

|                              |                                                                                                                                                                                                                                                     |     |                                                                                                                  |                                                                       |                                                                                                                                                                                       |
|------------------------------|-----------------------------------------------------------------------------------------------------------------------------------------------------------------------------------------------------------------------------------------------------|-----|------------------------------------------------------------------------------------------------------------------|-----------------------------------------------------------------------|---------------------------------------------------------------------------------------------------------------------------------------------------------------------------------------|
|                              | 73% female<br>77% vaccinated for COVID-19<br>42.8 years mean age                                                                                                                                                                                    |     |                                                                                                                  |                                                                       |                                                                                                                                                                                       |
| Oguz-Akarsu et al, 2021 [32] | 41.8 years mean age (18-87 years)<br>Comorbidities (32.4%), e.g., hypertension, endocrine, diabetes, respiratory etc.<br>116 males (52.3%)<br>36 smokers (16.2%)<br>9 Immunocompromised (4.1%)<br>Widespread pain (36.4%)<br>Extremity pain (21.8%) | 222 | Assessment via interview, 1.5 – 3 months post COVID-19 infection (+ve PCR), by two experienced neurologists      | 0 – 3 months following COVID-19 infection                             | Strong association between neuropathic pain and headache / pain syndrome presence<br>Pain generally more frequent in females                                                          |
| Novak et al, 2022 [26]       | Long-Covid<br>Autonomic, multisystemic symptoms                                                                                                                                                                                                     | 9   | Assessment via skin biopsies, inflammatory and autoimmune markers, sudomotor testing,                            | 4 – 6 weeks after initial COVID-19 infection                          | Long-Covid associations – SFN, respiratory dysregulation, chronic inflammation, cerebrovascular dysregulation                                                                         |
| Jena et al, 2022 [24]        | 102 mild, 62 moderate, 18 severe COVID-19 infection<br>72.53% male (132 / 182)<br>32.6% diabetes (66 / 182)<br>Smoking and regular alcohol = 15 / 182<br>55 / 182 history of addiction<br>48.86 years mean age (13.98 years SD)                     | 182 | Assessment via DN4 questionnaire (collected data off the ward also)                                              | Not documented                                                        | Higher COVID-19 severity (cytokine storm)<br>Higher BMI<br>History of Addiction                                                                                                       |
| Shouman et al, 2021 [30]     | All patients referred for autonomic testing following COVID-19 infection<br>41% male (11 / 27)                                                                                                                                                      | 27  | Assessment via sudomotor function, cardiovascular function, autonomic reflex screen, thermoregulatory sweat test | 0 – 122 days following initial COVID-19 infection                     | Long-Covid overlap with ANS dysfunction and SFN<br>Neuropathic pain exacerbation and new-onset following COVID-19<br>Pre-existing neurological disease worsened by COVID-19 infection |
| Scherlinger et al, 2021 [29] | 40% male (12 / 30)<br>10% diabetic (3 / 30)<br>Persistent symptoms had a cyclic pattern in 28 patients (93.3%)<br>40 years mean age (35 -54 years)                                                                                                  | 30  | Assessment via physical examination (5 physicians), DN4 questionnaire, visual analogue scales, blood tests       | Clinic evaluation 102 – 164 days following COVID-19 initial infection | COVID-19 infection increases anxiety / depression risk                                                                                                                                |

|                          |                                                                                                         |     | Also, fibromyalgia screen and rare systemic / autonomic disease screening  | 0-21 days symptom onset following initial COVID-19 infection                                                                                                          |                                                                                                                |
|--------------------------|---------------------------------------------------------------------------------------------------------|-----|----------------------------------------------------------------------------|-----------------------------------------------------------------------------------------------------------------------------------------------------------------------|----------------------------------------------------------------------------------------------------------------|
| Starace et al, 2021 [33] | 69.7% of patients with TE and TR received treatments<br>Comorbidities not recorded<br>24 men, 104 women | 128 | Assessment via clinical observation in hair specialist clinic appointments | 0 – 31 days symptom onset following initial COVID-19 infection (62.5%) (early onset)<br><br>12 weeks+ symptom onset following COVID-19 infection (47.8%) (late onset) | COVID-19 severity<br>Drug treatments potential risk factors (anticoagulants, hydroxychloroquine, azithromycin) |
