# Supplementary material for: COVID-19-Related Neuropathic Pain: A Systematic Review and Meta-Analysis
Source: J Clin Med. 2023 Feb 20;12(4):1672. doi: 10.3390/jcm12041672 (PMC9966617; doi:10.3390/jcm12041672)
Supplement: Supplementary file 1 [file jcm-12-01672-s001.zip › Supplementary Table S1.xlsx]

## Sheet: Sheet1
Year	Study	Was the study’s target population a close representation of the national population in relation to relevant variables, e.g. age, sex, occupation?	Was the sampling frame a true or close representation of the target population?	Was some form of random selection used to select the sample, OR, was a census undertaken?	Was the likelihood of non-response bias minimal?	Were data collected directly from the subjects (as opposed to a proxy)?	Was an acceptable case definition used in the study?	Was the study instrument that measured the parameter of interest (e.g. prevalence of low back pain) shown to have reliability and validity (if necessary)?	Was the same mode of data collection used for all subjects?	Were the numerator(s) and denominato r(s) for the parameter of interest appropriate?		Summary on the overall risk of study bias	Outcome
2021	Miller et al, 2021 [25]	1	0	1	0	0	0	0	0	0		2	Low-Risk
2022	Ojeda et al, 2022 [28]	1	0	1	1	0	0	0	0	0		3	Low-Risk
2022	Magdy et al, 2022 [31]	0	1	1	0	0	0	0	0	0		2	Low-Risk
2022	Ocak & Sahin, 2022 [27]	0	1	1	0	0	0	0	0	0		2	Low-Risk
2022	Ali et al, 2022 [23]	1	0	1	0	0	0	0	0	0		2	Low-Risk
2021	Oguz-Akarsu et al, 2021 [32]	0	1	1	1	0	0	1	0	0		4	Moderate- Risk
2022	Novak et al, 2022 [26]	1	1	1	0	0	0	0	0	0		3	Low-Risk
2022	Jena et al, 2022 [24]	1	0	0	0	0	0	0	0	0		1	Low-Risk
2021	Shouman et al, 2021 [30]	0	0	1	0	0	0	0	0	0		1	Low-Risk
2021	Scherlinger et al, 2021 [29]	0	1	0	0	0	1	0	0	0		2	Low-Risk
2021	Starace et al, 2021 [33]	1	1	1	1	0	0	1	0	1		6	High-Risk
